# Supplementary material for: Secondary Dislocations in Type B and C Injuries of the Subaxial Cervical Spine: Risk Factors and Treatment
Source: MDPI journal article supplement (doi:10.3390/jcm13030700), 2024-01-25
Supplement: s1 [file s1]

**Supplementary Table S1:** Comparison of demographic variables and injury morphology between treatment groups.

| Variable                                | Anterior<br>(n = 125) | Posterior<br>(n = 43) | Combined<br>(n = 107) | p                  |
|-----------------------------------------|-----------------------|-----------------------|-----------------------|--------------------|
| <b>Patient Characteristics</b>          |                       |                       |                       |                    |
| Age [years, mean (SD)]                  | 57.4 (19.8)           | 70.1 (16.6)           | 57.3 (20.0)           | <.001 <sup>1</sup> |
| Sex [% female]                          | 24.0                  | 34.9                  | 26.2                  | .357 <sup>2</sup>  |
| Preexisting spine pathology [%]         | 4.8                   | 32.6                  | 14.0                  | .023 <sup>2</sup>  |
| <b>Injury Morphology</b>                |                       |                       |                       |                    |
| AO Spine Injury Type [%]                |                       |                       |                       | <.001 <sup>3</sup> |
| B2                                      | 12.8                  | 25.6                  | 11.2                  |                    |
| B3                                      | 51.2                  | 27.9                  | 18.7                  |                    |
| C                                       | 36.0                  | 46.5                  | 70.1                  |                    |
| Multilevel Primary Injury [%]           | 7.2                   | 4.7                   | 6.5                   | .947 <sup>2</sup>  |
| Any Modifier [%]                        | 51.2                  | 62.8                  | 39.3                  | .023 <sup>2</sup>  |
| (Potentially) unstable Facet Injury [%] | 44.0                  | 58.1                  | 70.1                  | <.001 <sup>2</sup> |

Statistical tests used: <sup>1</sup>ANOVA, <sup>2</sup>Fischer Freeman Halton, <sup>3</sup>Chi<sup>2</sup>.
