# Supplementary material for: Secondary Dislocations in Type B and C Injuries of the Subaxial Cervical Spine: Risk Factors and Treatment
Source: MDPI journal article supplement (doi:10.3390/jcm13030700), 2024-01-25
Supplement: s1 [file s1]

**Supplementary Table S2:** Frequency of primary stabilization methods (anterior, posterior, combined) in different age groups (years) depending on AO Spine primary injury morphology.

| Age group | AOS Primary |              | Primary stabilization |           |          |         |
|-----------|-------------|--------------|-----------------------|-----------|----------|---------|
|           |             |              | anterioir             | posterior | combined | total   |
| ≤50       | B2          | Count        | 10                    | 2         | 6        | 18      |
|           |             | % within row | 55.6 %                | 11.1 %    | 33.3 %   | 100.0 % |
|           | B3          | Count        | 14                    | 0         | 2        | 16      |
|           |             | % within row | 87.5 %                | 0.0 %     | 12.5 %   | 100.0 % |
|           | C           | Count        | 19                    | 3         | 32       | 54      |
|           |             | % within row | 35.2 %                | 5.6 %     | 59.3 %   | 100.0 % |
|           | Total       | Count        | 43                    | 5         | 40       | 88      |
|           |             | % within row | 48.9 %                | 5.7 %     | 45.5 %   | 100.0 % |
| 51-65     | B2          | Count        | 2                     | 1         | 4        | 7       |
|           |             | % within row | 28.6 %                | 14.3 %    | 57.1 %   | 100.0 % |
|           | B3          | Count        | 18                    | 2         | 6        | 26      |
|           |             | % within row | 69.2 %                | 7.7 %     | 23.1 %   | 100.0 % |
|           | C           | Count        | 11                    | 5         | 14       | 30      |
|           |             | % within row | 36.7 %                | 16.7 %    | 46.7 %   | 100.0 % |
|           | Total       | Count        | 31                    | 8         | 24       | 63      |
|           |             | % within row | 49.2 %                | 12.7 %    | 38.1 %   | 100.0 % |
| 66-80     | B2          | Count        | 2                     | 5         | 1        | 8       |
|           |             | % within row | 25.0 %                | 62.5 %    | 12.5 %   | 100.0 % |
|           | B3          | Count        | 22                    | 5         | 11       | 38      |
|           |             | % within row | 57.9 %                | 13.2 %    | 28.9 %   | 100.0 % |
|           | C           | Count        | 12                    | 9         | 23       | 44      |
|           |             | % within row | 27.3 %                | 20.5 %    | 52.3 %   | 100.0 % |
|           | Total       | Count        | 36                    | 19        | 35       | 90      |
|           |             | % within row | 40.0 %                | 21.1 %    | 38.9 %   | 100.0 % |
| ≥80       | B2          | Count        | 2                     | 3         | 1        | 6       |
|           |             | % within row | 33.3 %                | 50.0 %    | 16.7 %   | 100.0 % |
|           | B3          | Count        | 10                    | 5         | 1        | 16      |
|           |             | % within row | 62.5 %                | 31.3 %    | 6.3 %    | 100.0 % |
|           | C           | Count        | 3                     | 3         | 6        | 12      |
|           |             | % within row | 25.0 %                | 25.0 %    | 50.0 %   | 100.0 % |
|           | Total       | Count        | 15                    | 11        | 8        | 34      |
|           |             | % within row | 44.1 %                | 32.4 %    | 23.5 %   | 100.0 % |
| Total     | B2          | Count        | 16                    | 11        | 12       | 39      |
|           |             | % within row | 41.0 %                | 28.2 %    | 30.8 %   | 100.0 % |
|           | B3          | Count        | 64                    | 12        | 20       | 96      |
|           |             | % within row | 66.7 %                | 12.5 %    | 20.8 %   | 100.0 % |
|           | C           | Count        | 45                    | 20        | 75       | 140     |
|           |             | % within row | 32.1 %                | 14.3 %    | 53.6 %   | 100.0 % |
|           | Total       | Count        | 125                   | 43        | 107      | 275     |
|           |             | % within row | 45.5 %                | 15.6 %    | 38.9 %   | 100.0 % |
